# Supplementary material for: The enhanced photocatalytic properties of Bi/BiOCl composites for H2O2 production
Source: Royal Society of Chemistry journal article supplement (doi:10.1039/d2nj04267c), 2022-01-01
Supplement: d2nj04267c1.pdf [file d2nj04267c1.pdf]

Electronic Supplementary Information (ESI) for New Journal of Chemistry.

## Supporting Information

### The Enhanced Photocatalytic Properties for H<sub>2</sub>O<sub>2</sub> Production over Bi/BiOCl Composite

Liran Liu, Hanping Fu, Yating Zeng, Li Feng, Tianxiang Zhang, Qingshuang Liang\*,  
Xiufeng Xiao\*

Fujian Provincial Key Laboratory of Advanced Materials Oriented Chemical Engineering,  
College of Chemistry and Material Science, Fujian Normal University, Fuzhou, Fujian 350007,  
China

It can be seen from the figure S1 that pure Ti(SO<sub>4</sub>)<sub>2</sub> has no absorption peak at 400nm. The absorption curve of the complex solution after the reaction of Ti(SO<sub>4</sub>)<sub>2</sub> and H<sub>2</sub>O<sub>2</sub> was obtained by scanning. It was found that the complex formed a new peak at 400nm(H<sub>2</sub>TiO<sub>4</sub>) and became stronger with the increase of H<sub>2</sub>O<sub>2</sub> concentration.

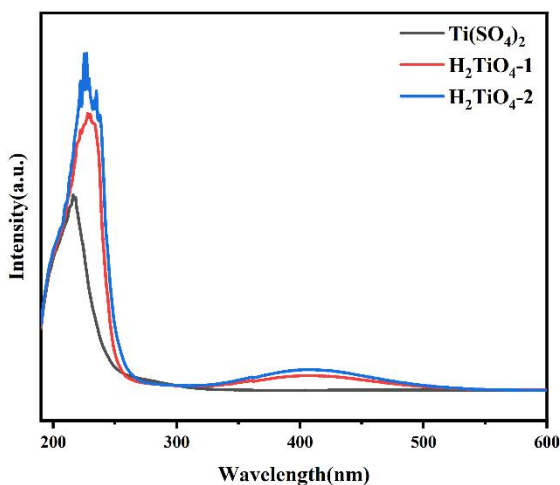

**Fig. S1** UV-vis absorption spectra for H<sub>2</sub>TiO<sub>4</sub>

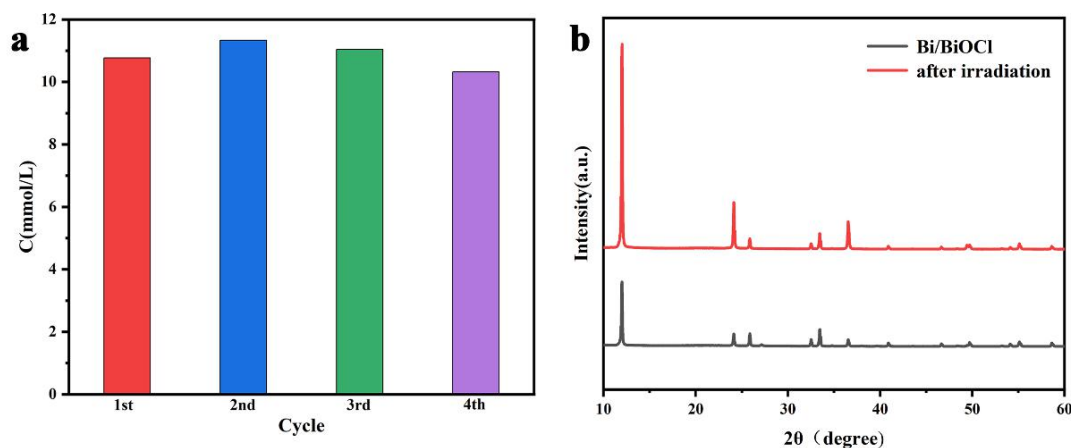

**Fig. S2** catalytic stability of Bi/BiOCl (a) and XRD (b) of fresh and reused Bi/BiOCl

In the cycling tests, the main processes were the same as those of photocatalytic  $\text{H}_2\text{O}_2$ -production experiments. After each cycle, in order to reduce the possible loss of photocatalyst, the resulting suspension solution was centrifugated, washed with water for one time and directly re-dispersed in 40 mL of aqueous solution containing 5 vol% formic acid. Then start the next cyclic stability test.

**Table. S1 Comparison of photocatalytic  $\text{H}_2\text{O}_2$  production with Different Catalysts**

| Catalysts                                           | Dosage (mg) | energy                                            | Reaction solution                              | $\text{H}_2\text{O}_2$ production $\mu\text{mol/h}$ |
|-----------------------------------------------------|-------------|---------------------------------------------------|------------------------------------------------|-----------------------------------------------------|
| Pt/ $\text{Bi}_2\text{WO}_6$ <sup>1</sup>           | 65          | 150 W Xe arc lamp >400 nm                         | phenol/water solution                          | 5                                                   |
| Au/ $\text{BiVO}_4$ <sup>2</sup>                    | 50          | Xe arc lamp >420 nm                               | EtOH/water solution                            | 257                                                 |
| $\text{BiOCl}$ <sup>3</sup>                         | 50          | 150 W Ultrasonic cleaner                          | water                                          | 28                                                  |
| $\text{CoWO}_4/\text{Bi}_2\text{WO}_6$ <sup>4</sup> | 50          | 300 W Xenon lamp with a 420 nm cut-off filter     | Water (adjusting the pH with $\text{HClO}_4$ ) | <50                                                 |
| xrGO- $\text{BiVO}_4$ <sup>5</sup>                  | 8           | Newport solar simulator with an AM 1.5 air filter | Water (PH=3)                                   | <175                                                |

|           |    |               |                         |      |
|-----------|----|---------------|-------------------------|------|
| This work | 50 | 300 W Xe lamp | HCOOH/water<br>solution | 5400 |
|-----------|----|---------------|-------------------------|------|

1. J. Sheng, X. Li and Y. Xu, ACS Catalysis, 2014, 4, 732–737.
2. H. Hirakawa, S. Shiota, Y. Shiraishi, H. Sakamoto, S. Ichikawa and T. Hirai, ACS Catalysis, 2016, 6, 4976-4982.
3. D. Shao, L. Zhang, S. Sun and W. Wang, ChemSusChem, 2018, 11, 527-531.
4. J. Wang, L. Yang and L. Zhang, Chemical Engineering Journal, 2021, 420.
5. N. Dhabarde, O. Carrillo-Ceja, S. Tian, G. Xiong, K. Raja and V. R. Subramanian, The Journal of Physical Chemistry C, 2021, 125, 23669-23679.
